# Supplementary material
Source: Elsevier journal article supplement (https://comptes-rendus.academie-sciences.fr/chimie/article/10.1016/j.crci.2009.03.002/file/attach/mmc1.pdf)
Supplement: mmc1 [file mmc1.pdf]

Supplementary Material

The [Pd(bipy)]<sup>2+</sup> “merry-go-round”: insights into the lability of the Pd–N bond

Partha Pratim Mukhopadhyay,<sup>[a]</sup> Jean-Claude Chambron,<sup>\*[a]</sup> and Roland Graff<sup>[b]</sup>

Table of Contents

|                                                                                                                                                                                     |    |
|-------------------------------------------------------------------------------------------------------------------------------------------------------------------------------------|----|
| <b>Scheme S1.</b> The target metallo-organic macrotricyclic.....                                                                                                                    | 2  |
| <b>Scheme S2.</b> Structural formulae of tripod ligands <b>1</b> and <b>2</b> , and their [Pd(bipy)] <sup>2+</sup> complexes.....                                                   | 3  |
| <b>Table S1.</b> <sup>1</sup> H NMR data of [Pd( <b>1</b> )(bipy)](NO <sub>3</sub> ) <sub>2</sub> , [Pd( <b>2</b> )(bipy)](NO <sub>3</sub> ) <sub>2</sub> and their precursors..... | 4  |
| <b>Figure S1.</b> Variable temperature <sup>1</sup> H NMR spectra of [Pd( <b>1</b> )(bipy)](NO <sub>3</sub> ) <sub>2</sub> .....                                                    | 5  |
| <b>Figure S2.</b> Variable temperature <sup>1</sup> H NMR spectra of [Pd( <b>2</b> )(bipy)](NO <sub>3</sub> ) <sub>2</sub> .....                                                    | 6  |
| <b>Figure S3.</b> <sup>1</sup> H/ <sup>1</sup> H 2D NMR COSY map of [Pd( <b>1</b> )(bipy)](NO <sub>3</sub> ) <sub>2</sub> .....                                                     | 7  |
| <b>Figure S4.</b> <sup>1</sup> H/ <sup>1</sup> H 2D NMR ROESY map of [Pd( <b>1</b> )(bipy)](NO <sub>3</sub> ) <sub>2</sub> .....                                                    | 8  |
| <b>Figure S5.</b> <sup>13</sup> C/ <sup>1</sup> H 2D NMR HSQC map of [Pd( <b>2</b> )(bipy)](NO <sub>3</sub> ) <sub>2</sub> .....                                                    | 9  |
| <b>Figure S6.</b> <sup>13</sup> C/ <sup>1</sup> H 2D NMR HMBC map of [Pd( <b>2</b> )(bipy)](NO <sub>3</sub> ) <sub>2</sub> .....                                                    | 10 |
| <b>Table S2.</b> Estimated errors of the free energies of activation.....                                                                                                           | 11 |

[a] ICMUB (UMR n° 5260 of the CNRS), Université de Bourgogne, 9 avenue Alain Savary, BP 47870, 21078 Dijon, France

Tel: +33 (0) 380 39 61 16

Fax: +33 (0) 380 39 61 17

E-mail: Jean-Claude.Chambron@u-bourgogne.fr

[b] Institut de Chimie (UMR n° 7177 of the CNRS), Université de Strasbourg, 1 rue Blaise Pascal, BP 296R8, 67008 Strasbourg, France

1  
2  
3  
4  
5  
6  
7  
8  
9  
10  
11  
12  
13  
14  
15  
16  
17  
18  
19  
20  
21  
22  
23  
24  
25  
26  
27  
28  
29  
30  
31  
32  
33  
34  
35  
36  
37  
38  
39  
40  
41  
42  
43  
44  
45  
46  
47  
48  
49  
50  
51  
52  
53  
54  
55  
56  
57  
58  
59  
60  
61  
62  
63  
64  
65

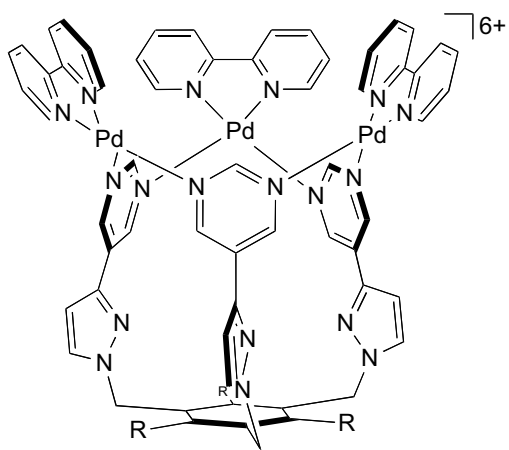

**Scheme S1.** The target metallo-organic macrotricycles  $[\text{Pd}_3(\text{bipy})_3(\mathbf{1})]^{2+}$  and  $[\text{Pd}_3(\text{bipy})_3(\mathbf{2})]^{2+}$ .

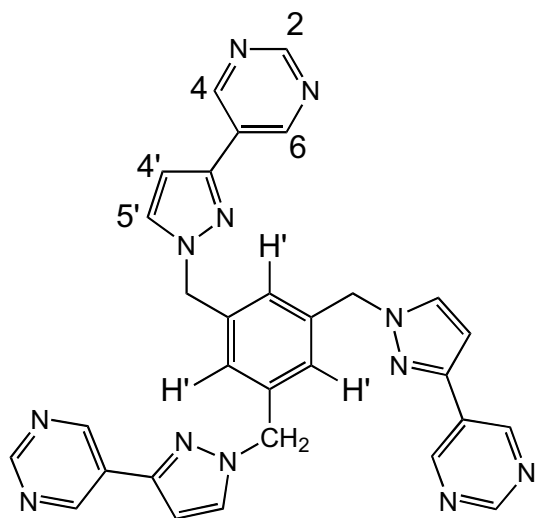

1

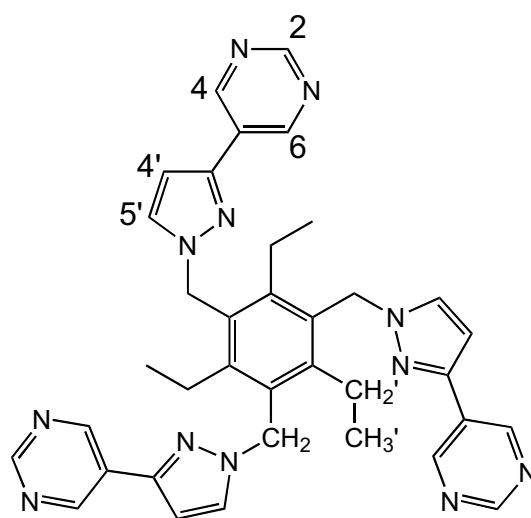

2

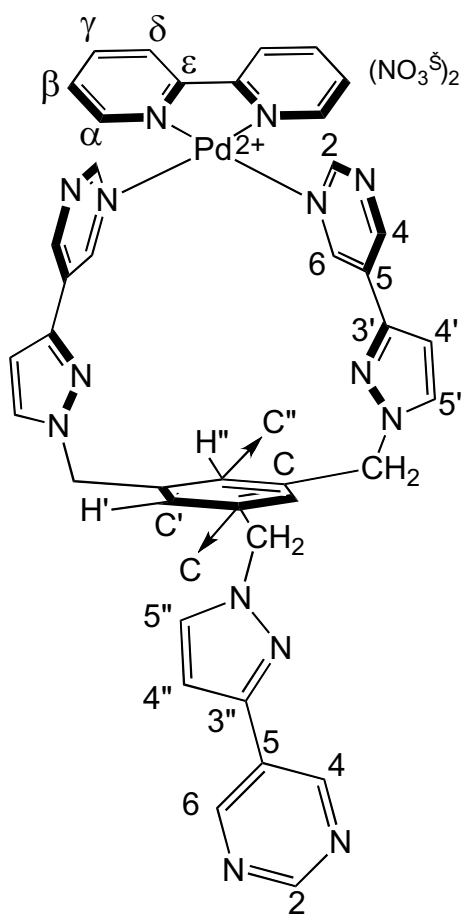

[Pd(1)(bipy)](NO<sub>3</sub>)<sub>2</sub>

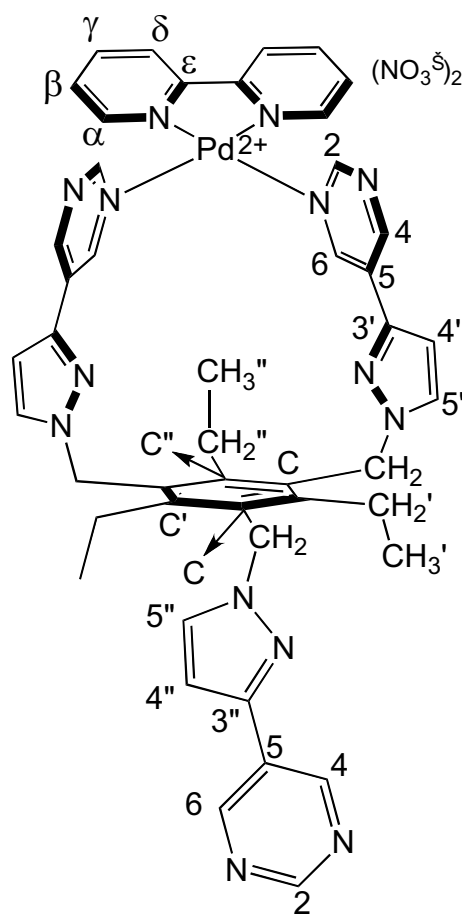

[Pd(2)(bipy)](NO<sub>3</sub>)<sub>2</sub>

**Scheme S2.** Structural formulae of tripod ligands **1** and **2**, and their [Pd(bipy)]<sup>2+</sup> complexes.

**Table S1.** <sup>1</sup>H NMR data and calculated  $\Delta\delta$  between [Pd(**1**)(bipy)](NO<sub>3</sub>)<sub>2</sub> and [Pd(**2**)(bipy)](NO<sub>3</sub>)<sub>2</sub>, and their relevant precursors, [Pd(bipy)](NO<sub>3</sub>)<sub>2</sub>, and the free ligands **1** and **2**.<sup>a</sup>

| Compound/Proton                                       | 2    | 2°    | 4    | 4°    | 6     | 6°    | 4'   | 4''   | 5'   | 5''  | H'   | H''  | $\alpha$ | $\beta$ | $\gamma$ | $\delta$ | CH <sub>2</sub> | CH <sub>2</sub> <sup>o</sup> | CH <sub>2</sub> ' | CH <sub>2</sub> '' | CH <sub>3</sub> ' | CH <sub>3</sub> '' |  |  |
|-------------------------------------------------------|------|-------|------|-------|-------|-------|------|-------|------|------|------|------|----------|---------|----------|----------|-----------------|------------------------------|-------------------|--------------------|-------------------|--------------------|--|--|
| [Pd(bipy)](NO <sub>3</sub> ) <sub>2</sub>             |      |       |      |       |       |       |      |       |      |      |      |      | 8.28     | 7.83    | 8.45     | 8.61     |                 |                              |                   |                    |                   |                    |  |  |
| <b>1</b>                                              | 9.07 | 9.07  | 9.06 | 9.06  | 9.06  | 9.06  | 6.88 | 6.88  | 7.94 | 7.94 | 7.08 | 7.08 |          |         |          |          | 5.40            | 5.40                         |                   |                    |                   |                    |  |  |
| [Pd( <b>1</b> )(bipy)](NO <sub>3</sub> ) <sub>2</sub> | 9.78 | 9.12  | 9.40 | 9.16  | 10.06 | 9.16  | 7.02 | 6.97  | 8.14 | 7.99 | 7.47 | 7.71 | 7.84     | 7.69    | 8.52     | 8.79     | 5.37            | 5.38                         |                   |                    |                   |                    |  |  |
| $\Delta\delta$                                        | 0.71 | 0.05  | 0.34 | 0.10  | 1.00  | 0.10  | 0.14 | 0.09  | 0.20 | 0.05 | 0.39 | 0.63 | -0.44    | -0.14   | 0.07     | 0.18     | -0.03           | -0.02                        |                   |                    |                   |                    |  |  |
| <b>2</b>                                              | 9.10 | 9.10  | 9.14 | 9.14  | 9.14  | 9.14  | 6.92 | 6.92  | 7.62 | 7.62 |      |      |          |         |          |          | 5.51            | 5.51                         | 2.86              | 2.86               | 0.92              | 0.92               |  |  |
| [Pd( <b>2</b> )(bipy)](NO <sub>3</sub> ) <sub>2</sub> | 9.84 | 9.08  | 9.39 | 9.03  | 9.96  | 9.03  | 7.04 | 6.87  | 8.36 | 7.73 |      |      | 7.55     | 7.69    | 8.51     | 8.80     | 5.55            | 5.36                         | 2.98              | 4.18               | 0.78              | 1.33               |  |  |
| $\Delta\delta$                                        | 0.74 | -0.02 | 0.25 | -0.11 | 0.82  | -0.11 | 0.12 | -0.05 | 0.74 | 0.11 |      |      | -0.73    | -0.14   | 0.06     | 0.19     | 0.04            | -0.15                        | 0.12              | 1.32               | -0.14             | 0.41               |  |  |

<sup>a</sup> d<sup>6</sup>-dmso, 298 K, 600 MHz.

1  
2  
3  
4  
5  
6  
7  
8  
9  
10  
11  
12  
13  
14  
15  
16  
17  
18  
19  
20  
21  
22  
23  
24  
25  
26  
27  
28  
29  
30  
31  
32  
33  
34  
35  
36  
37  
38  
39  
40  
41  
42  
43  
44  
45  
46  
47  
48  
49  
50  
51  
52  
53  
54  
55  
56  
57  
58  
59  
60  
61  
62  
63  
64  
65

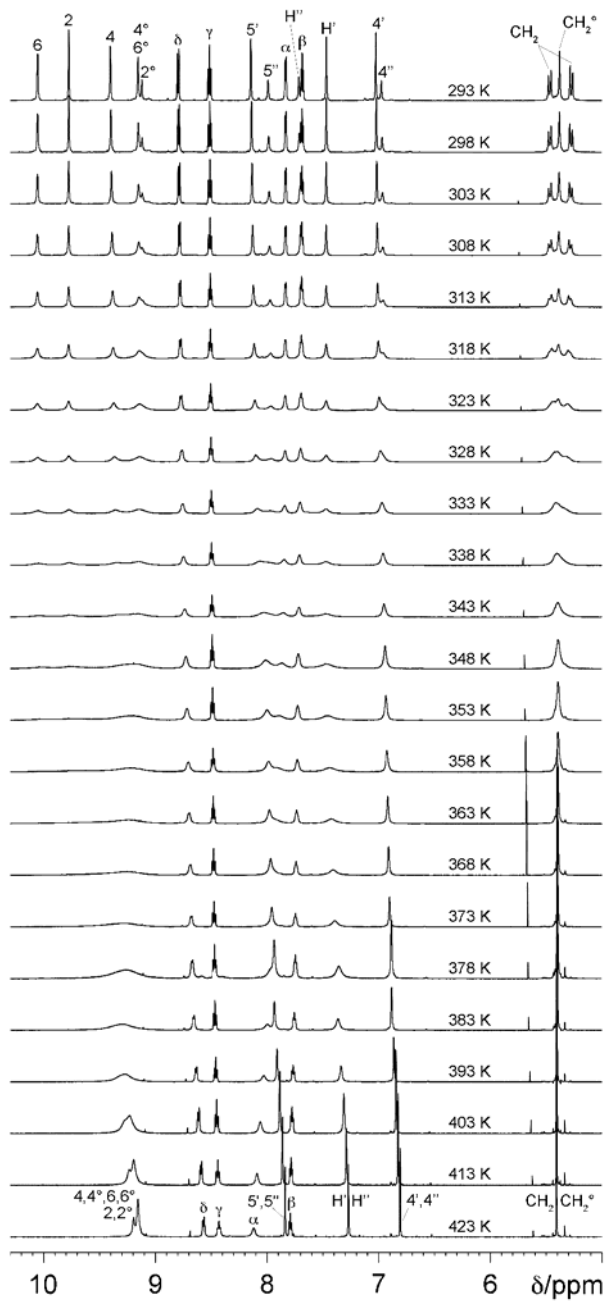

**Figure S1.** Sequence of variable temperature  $^1\text{H}$  NMR spectra of  $[\text{Pd}(\mathbf{1})(\text{bipy})](\text{NO}_3)_2$  in  $\text{d}^6$ -dmsol.

1  
2  
3  
4  
5  
6  
7  
8  
9  
10  
11  
12  
13  
14  
15  
16  
17  
18  
19  
20  
21  
22  
23  
24  
25  
26  
27  
28  
29  
30  
31  
32  
33  
34  
35  
36  
37  
38  
39  
40  
41  
42  
43  
44  
45  
46  
47  
48  
49  
50  
51  
52  
53  
54  
55  
56  
57  
58  
59  
60  
61  
62  
63  
64  
65

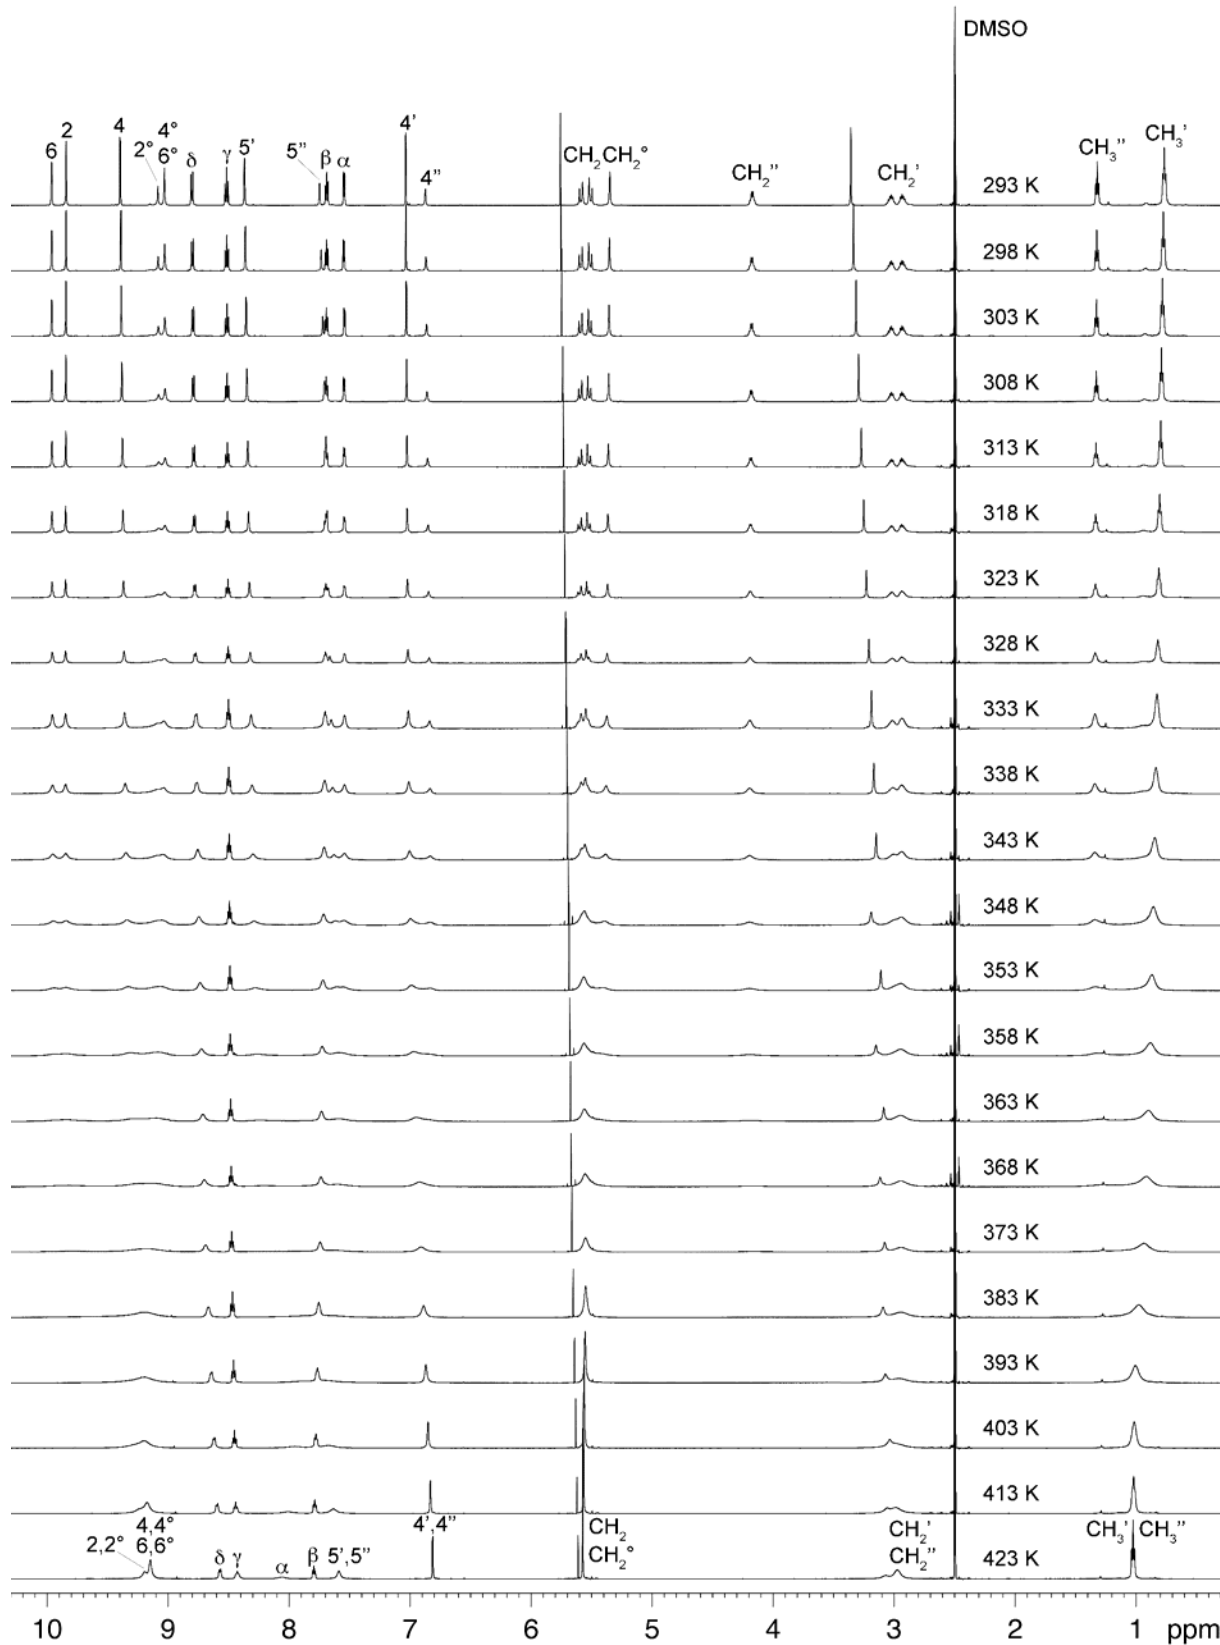

**Figure S2.** Sequence of variable temperature <sup>1</sup>H NMR spectra of [Pd(2)(bipy)](NO<sub>3</sub>)<sub>2</sub> in d<sup>6</sup>-dmsol.

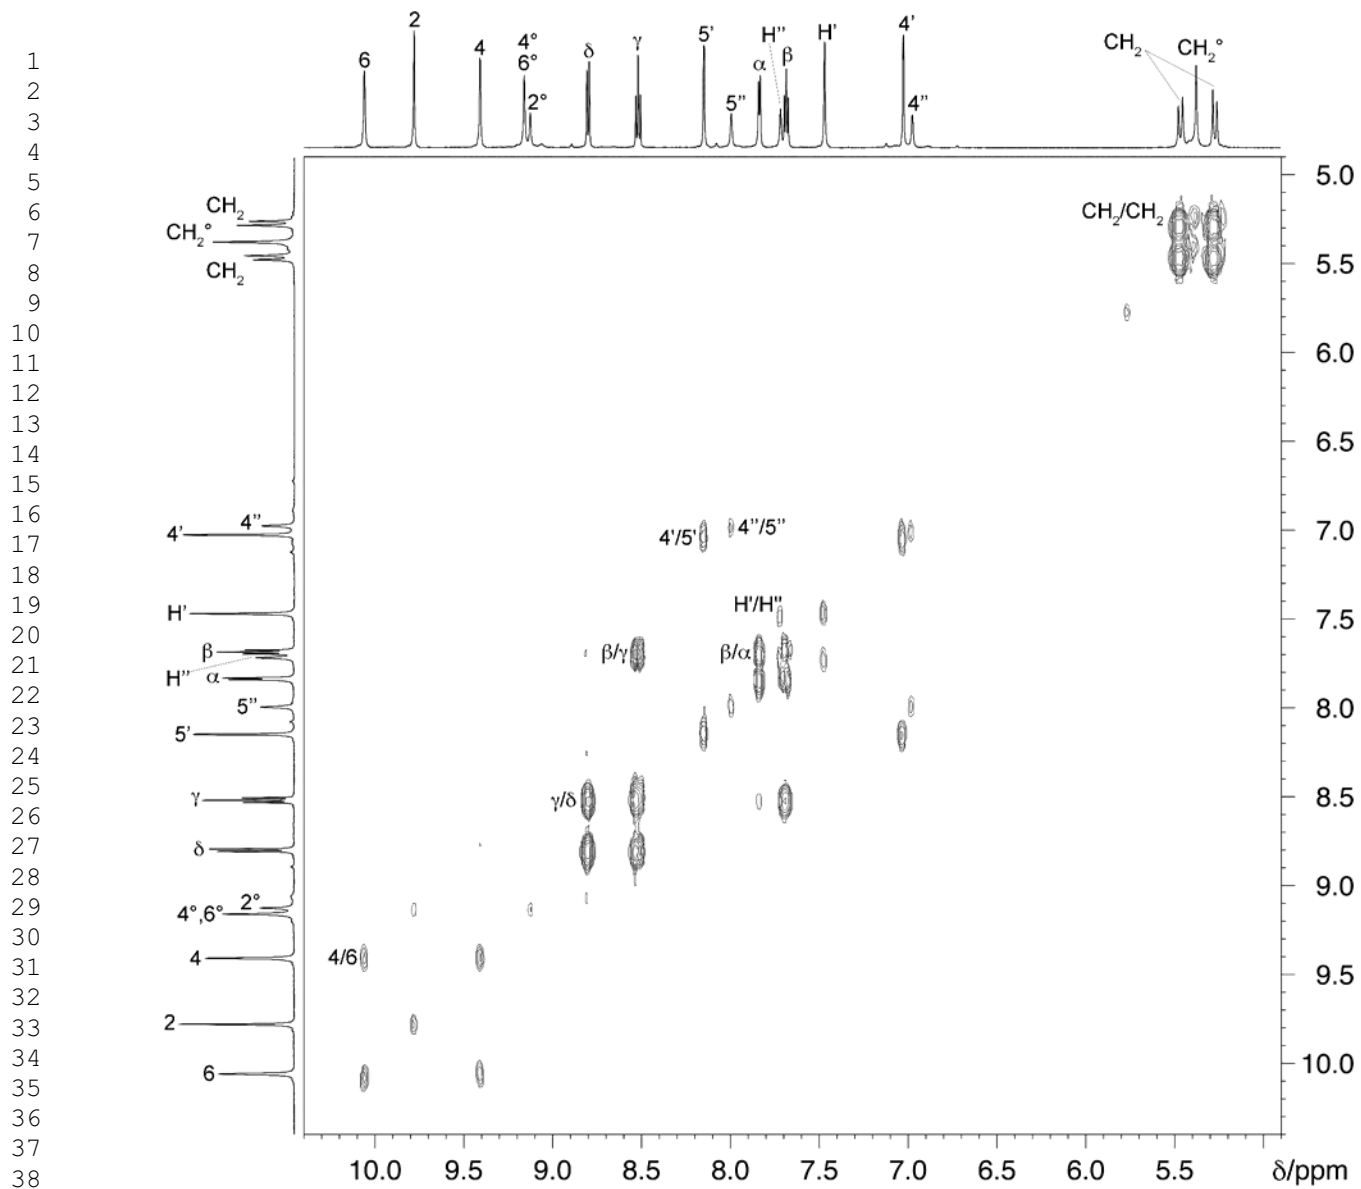

**Figure S3.**  $^1\text{H}/^1\text{H}$  2D NMR COSY map of  $[\text{Pd}(\mathbf{1})(\text{bipy})](\text{NO}_3)_2$  in  $d^6$ -dmsO (600 MHz, 298 K).

1  
2  
3  
4  
5  
6  
7  
8  
9  
10  
11  
12  
13  
14  
15  
16  
17  
18  
19  
20  
21  
22  
23  
24  
25  
26  
27  
28  
29  
30  
31  
32  
33  
34  
35  
36  
37  
38  
39  
40  
41  
42  
43  
44  
45  
46  
47  
48  
49  
50  
51  
52  
53  
54  
55  
56  
57  
58  
59  
60  
61  
62  
63  
64  
65

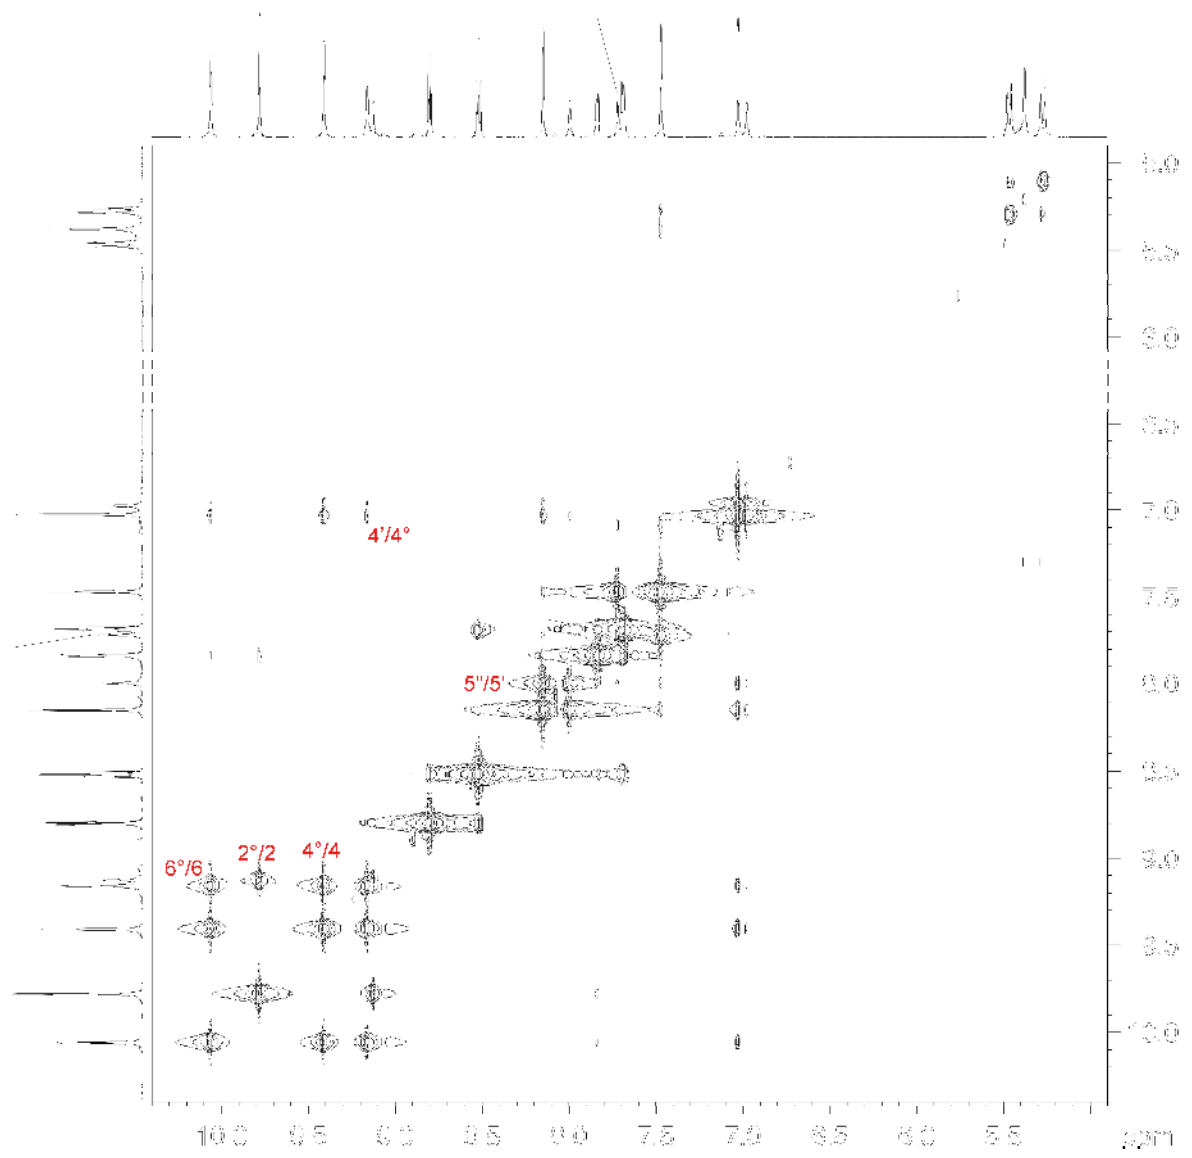

**Figure S4.**  $^1\text{H}/^1\text{H}$  2D NMR ROESY map of  $[\text{Pd}(\mathbf{1})(\text{bipy})](\text{NO}_3)_2$  in  $\text{d}^6\text{-dmsO}$  (600 MHz, 293 K).



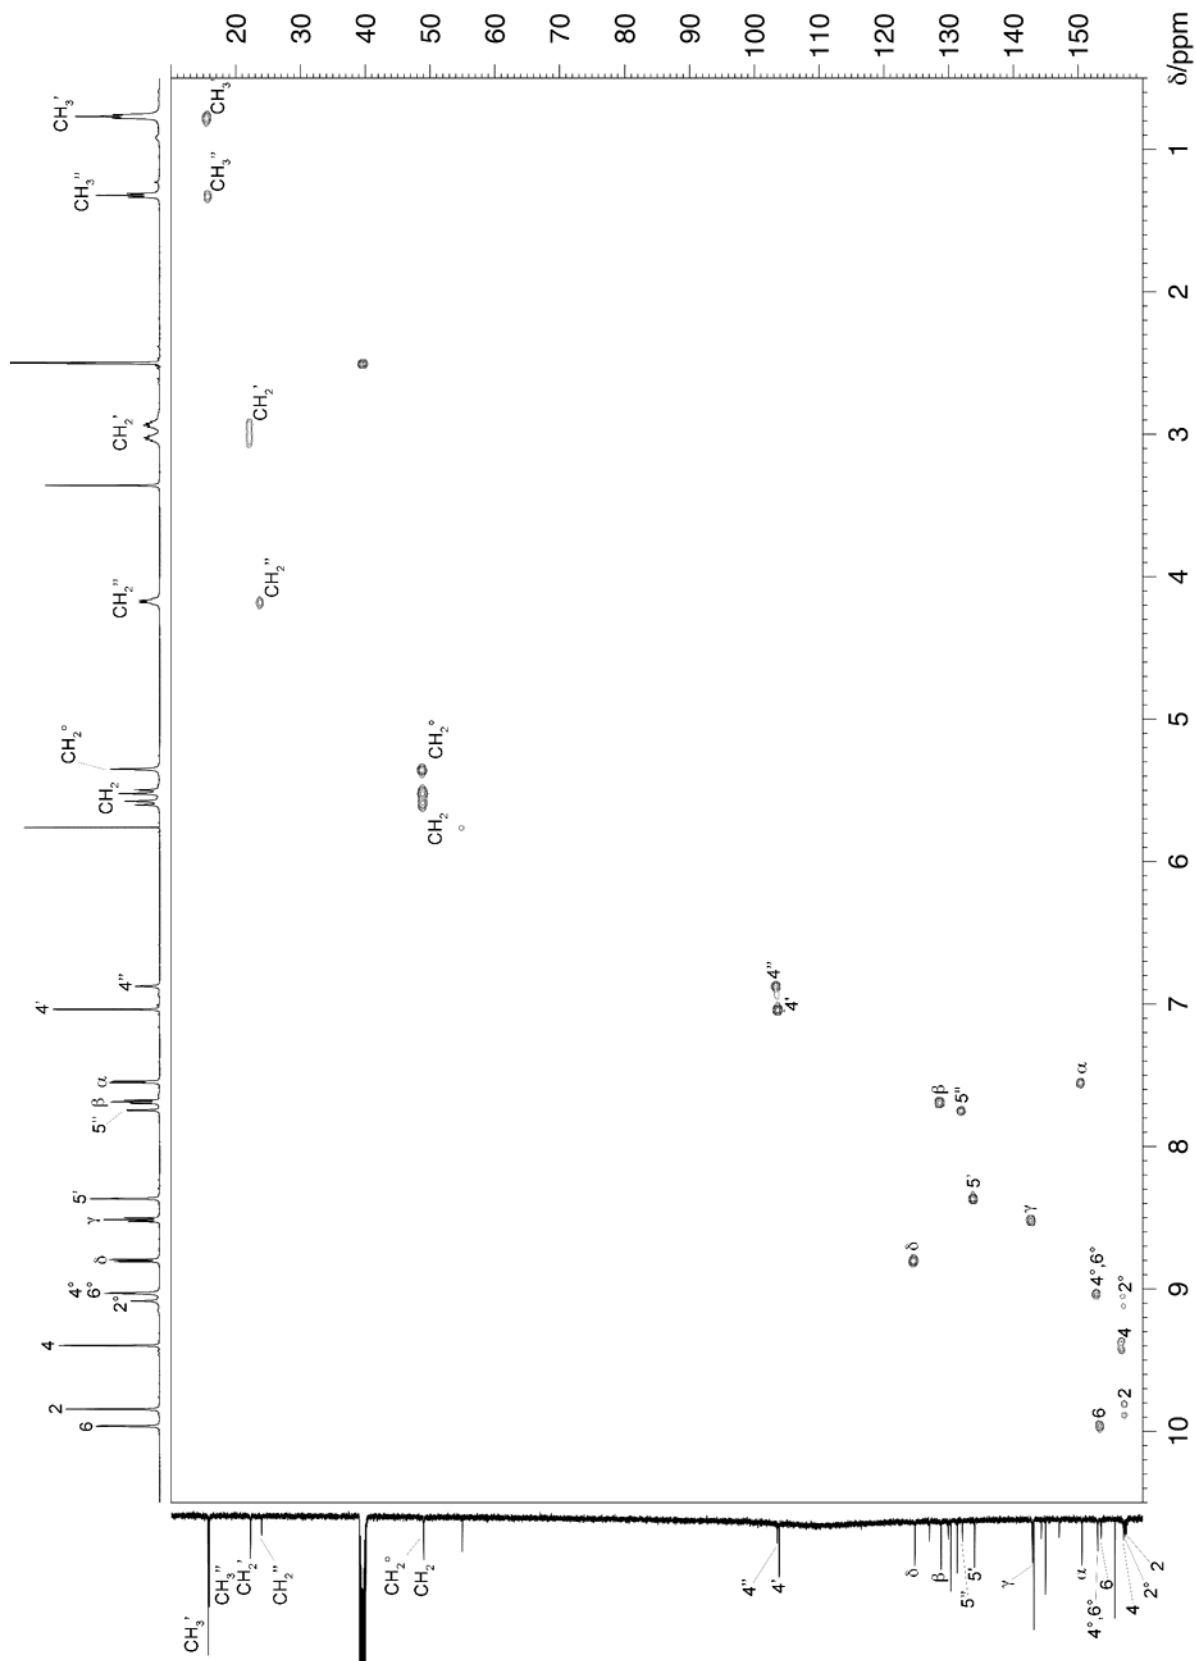

Figure S5.  $^{13}\text{C}/^1\text{H}$  2D NMR HSQC map of  $[\text{Pd}(\text{2})(\text{bipy})](\text{NO}_3)_2$  in  $\text{d}^6\text{-dmso}$  (600 MHz, 293 K).

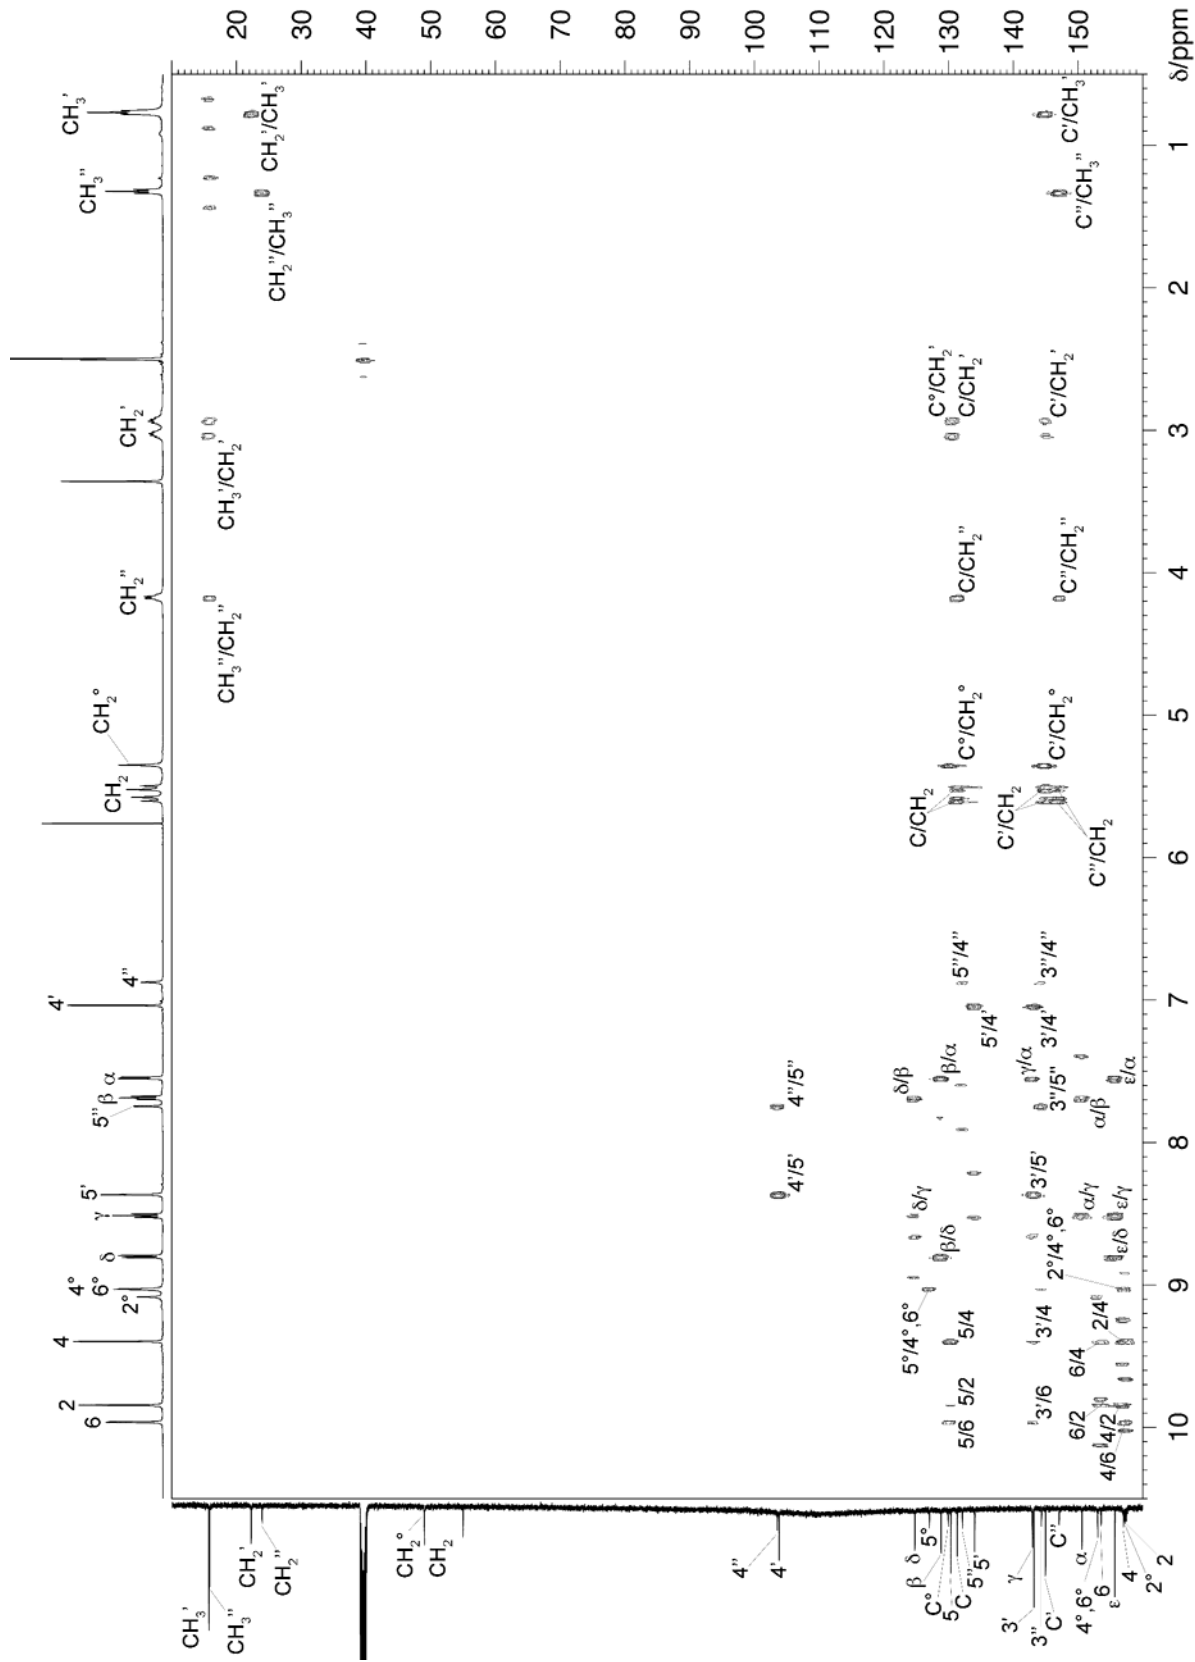

**Figure S6.** <sup>13</sup>C/<sup>1</sup>H 2D NMR HMBC map of [Pd(2)(bipy)](NO<sub>3</sub>)<sub>2</sub> in d<sup>6</sup>-dmsO (600 MHz, 298 K).

**Table 3.** Calculated errors of the free energies of activation.<sup>a</sup>

| Compound                    | Probe protons                        | $T_c/K$ | $\Delta\tilde{\nu}/\text{Hz}$ | $k_c/s^{-1}$ | $\Delta G^\ddagger/kJmol^{-1}$ | $\sigma(T_c)$ | $\sigma(\Delta\nu)$ | $\sigma(k_c)$ | $\partial(\Delta G)/\partial(T_c)$ | $\partial(\Delta G)/\partial(\Delta\nu)$ | $\partial(\Delta G)/\partial(k_c)$ | $\sigma(\Delta G^\ddagger)$ |
|-----------------------------|--------------------------------------|---------|-------------------------------|--------------|--------------------------------|---------------|---------------------|---------------|------------------------------------|------------------------------------------|------------------------------------|-----------------------------|
| [Pd(1)(bipy)] <sup>2+</sup> | 4',4"                                | 323     | 30                            | 66.64        | 68.0                           | 5.00          | 5.00                | 11.11         | 218.98                             | -89.51                                   | -40.30                             | 1.18                        |
|                             | 5',5"                                | 338     | 90                            | 199.93       | 68.2                           | 5.00          | 5.00                | 11.11         | 210.22                             | -31.22                                   | -14.06                             | 1.06                        |
|                             | H', H" and 4,4°                      | 343     | 150                           | 333.22       | 67.8                           | 5.00          | 5.00                | 11.11         | 206.10                             | -19.01                                   | -8.56                              | 1.03                        |
|                             | 2,2°                                 | 358     | 395                           | 877.47       | 68.1                           | 5.00          | 5.00                | 11.11         | 198.40                             | -7.54                                    | -3.39                              | 0.99                        |
|                             | 6,6°                                 | 363     | 540                           | 1199.58      | 68.1                           | 5.00          | 5.00                | 11.11         | 195.92                             | -5.59                                    | -2.52                              | 0.98                        |
|                             | 4',4"                                | 358     | 100                           | 222.14       | 72.1                           | 5.00          | 5.00                | 11.11         | 209.83                             | -29.76                                   | -13.40                             | 1.06                        |
| [Pd(2)(bipy)] <sup>2+</sup> | CH <sub>2</sub> , CH <sub>2</sub> °  | 358     | 120                           | 266.57       | 71.6                           | 5.00          | 5.00                | 11.11         | 208.31                             | -24.80                                   | -11.17                             | 1.05                        |
|                             | CH <sub>3</sub> ', CH <sub>3</sub> " | 373     | 330                           | 733.08       | 71.6                           | 5.00          | 5.00                | 11.11         | 200.24                             | -9.40                                    | -4.23                              | 1.00                        |
|                             | CH <sub>2</sub> ', CH <sub>2</sub> " | 383     | 715                           | 1588.33      | 71.1                           | 5.00          | 5.00                | 11.11         | 194.03                             | -4.45                                    | -2.00                              | 0.97                        |

<sup>a</sup>  $\sigma(\Delta G) = \sqrt{[\partial(\Delta G)/\partial(T_c)]^2 \sigma^2(T_c) + [\partial(\Delta G)/\partial(\Delta\nu)]^2 \sigma^2(\Delta\nu) + 2[\partial(\Delta G)/\partial(T_c)][\partial(\Delta G)/\partial(\Delta\nu)]\text{cov}(T_c, \Delta\nu)}$ . It is assumed that  $\text{cov}(T_c, \Delta\nu) = 0$ , as  $T_c$  and  $\Delta\nu$  are determined independently, see: P. Gans, Data Fitting in the Chemical Sciences, John Wiley & Sons Ltd, Chichester, England, 1992.
